# Supplementary material for: A Novel ZNF304/miR-183-5p/FOXO4 Pathway Regulates Cell Proliferation in Clear Cell Renal Carcinoma
Source: PubMed Central journal article supplement (PMC8529286; doi:10.3389/fonc.2021.710525), 2021-10-07
Supplement: Image_1.pdf [file Image_1.pdf]

Expression pattern of input genes in Kidney renal clear cell carcinoma (KIRC)

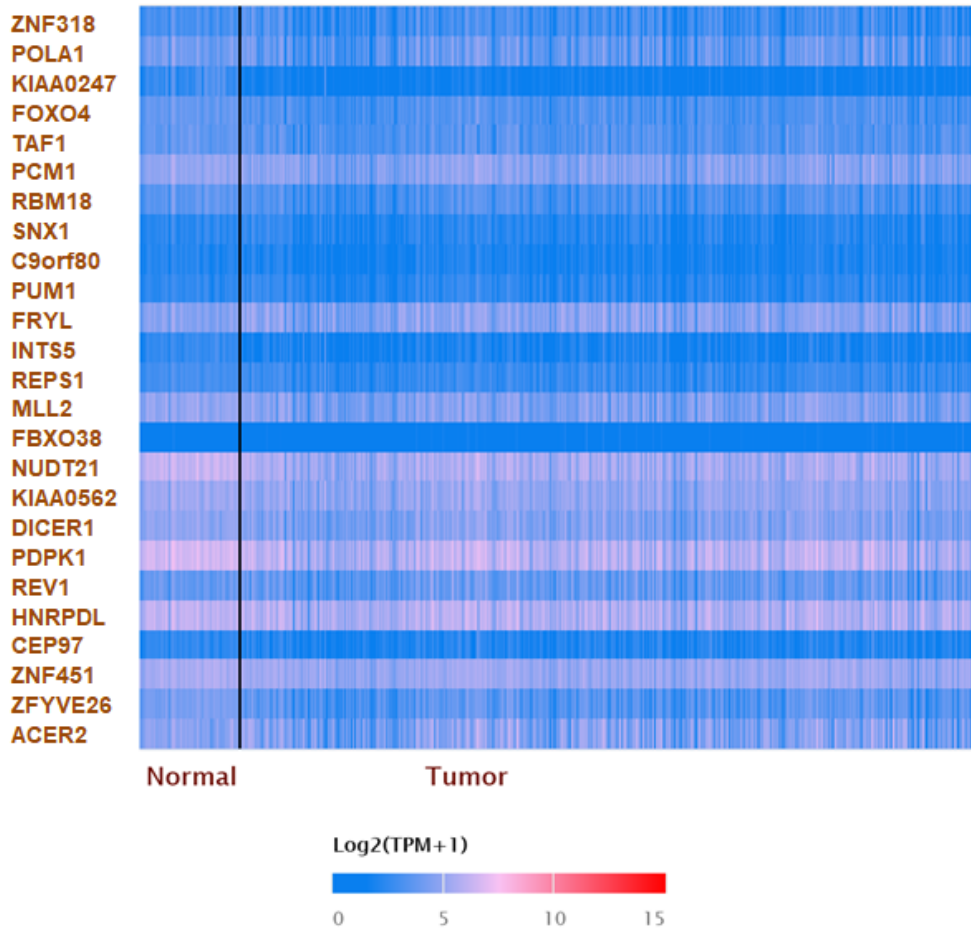

Supplementary Figure 1. Analyzed some genes positively related to ZNF304 expression in ccRCC tissues from the TCGA database.
