# Supplementary material for: A Novel ZNF304/miR-183-5p/FOXO4 Pathway Regulates Cell Proliferation in Clear Cell Renal Carcinoma
Source: PubMed Central journal article supplement (PMC8529286; doi:10.3389/fonc.2021.710525), 2021-10-07
Supplement: Image_2.pdf [file Image_2.pdf]

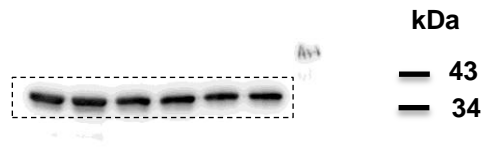

$\beta$ -actin

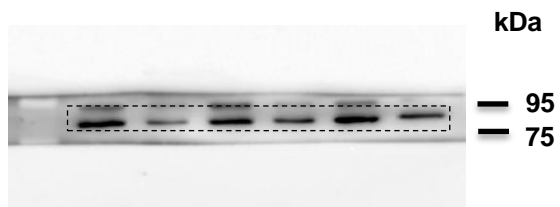

ZNF304

**Supplementary Figure 2.** The original immunoblots of Figure 1C.

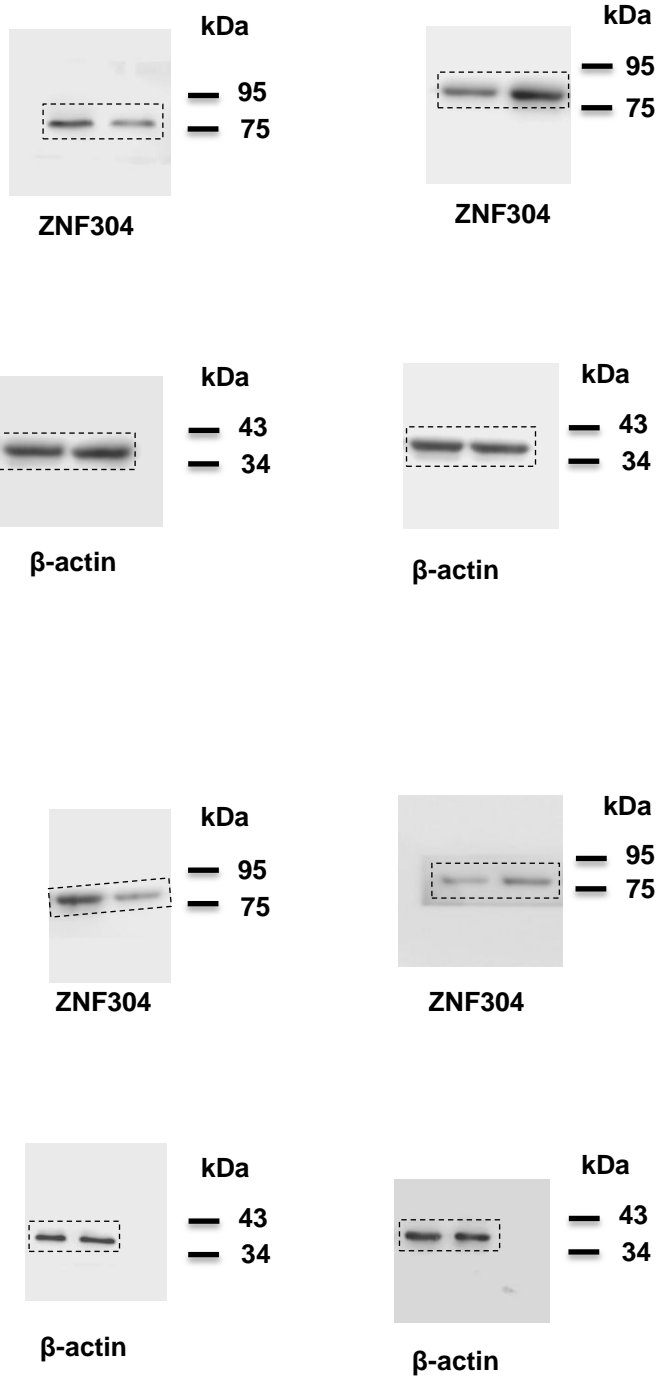

**Supplementary Figure 3.** The original immunoblots of Figure 2B.

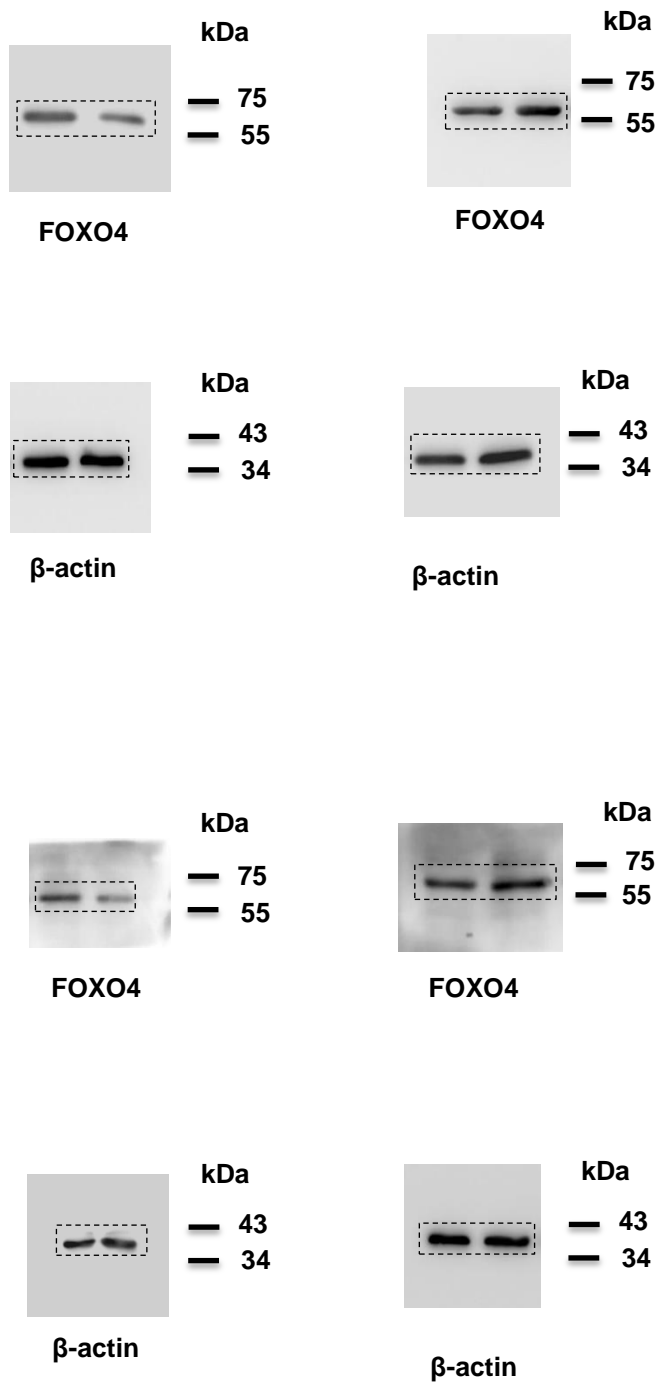

**Supplementary Figure 4.** The original immunoblots of Figure 3A.

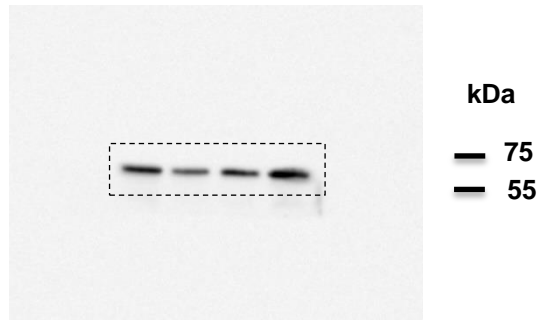

**FOXO4**

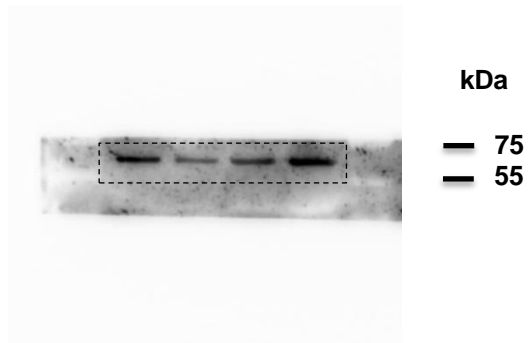

**FOXO4**

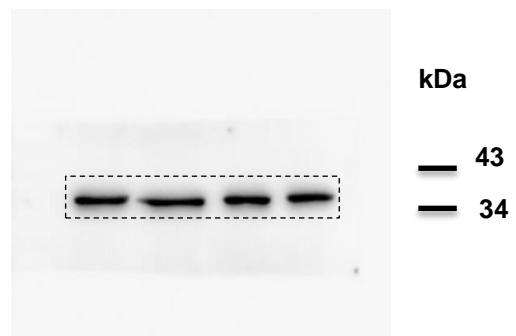

**$\beta$ -actin**

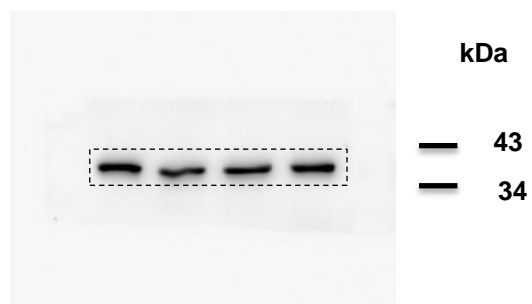

**$\beta$ -actin**

**Supplementary Figure 5.** The original immunoblots of Figure 4F.

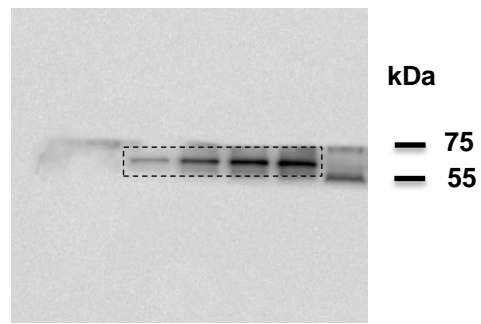

**FOXO4**

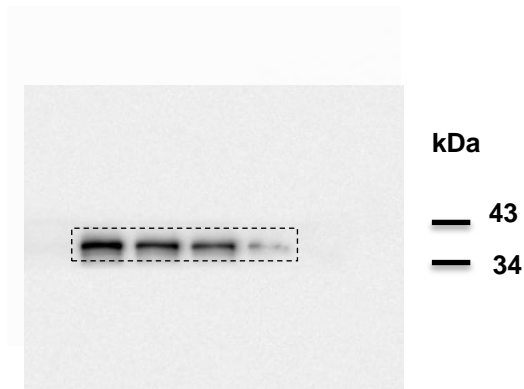

**Cyclin D1**

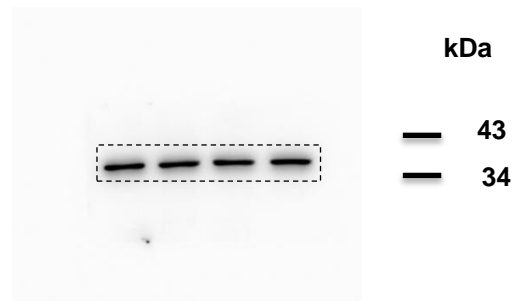

**$\beta$ -actin**

**Supplementary Figure 6.** The original immunoblots of Figure 6A.

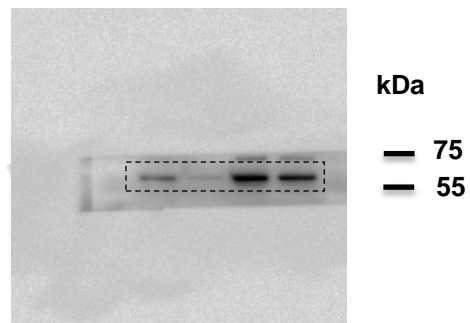

**FOXO4**

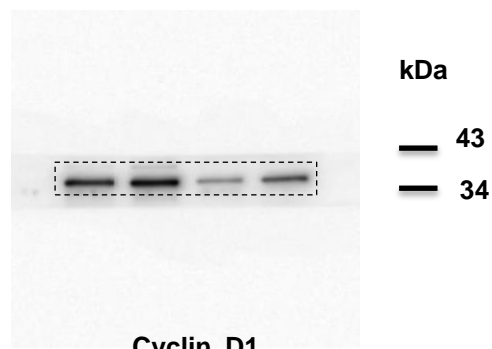

**Cyclin D1**

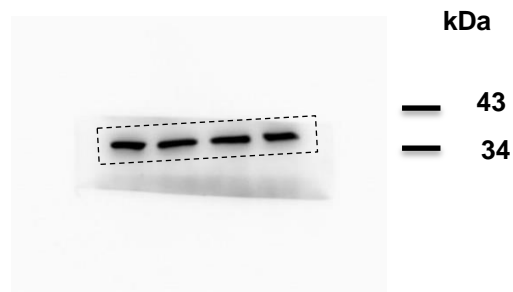

**$\beta$ -actin**

**Supplementary Figure 7.** The original immunoblots of Figure 6C.

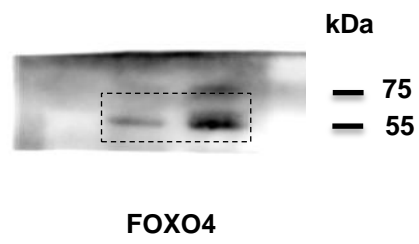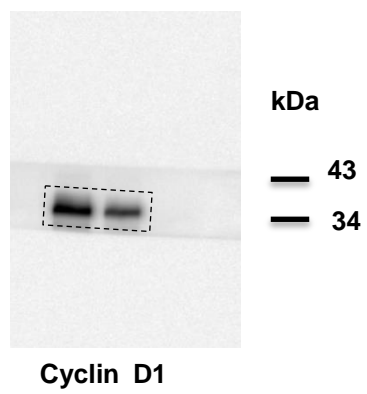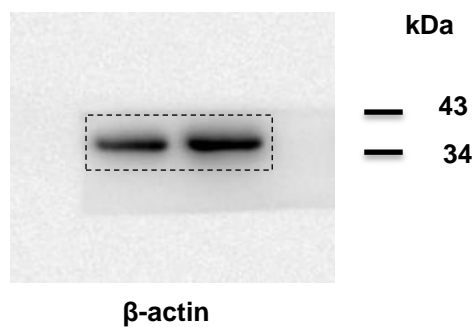

**Supplementary Figure 8.** The original immunoblots of Figure 6H.
